# Supplementary material for: Lysosomotropism depends on glucose: a chloroquine resistance mechanism
Source: PubMed Central journal article supplement (PMC5596595; doi:10.1038/cddis.2017.416), 2017-08-24
Supplement: cddis2017416x4.pdf [file cddis2017416x4.pdf]

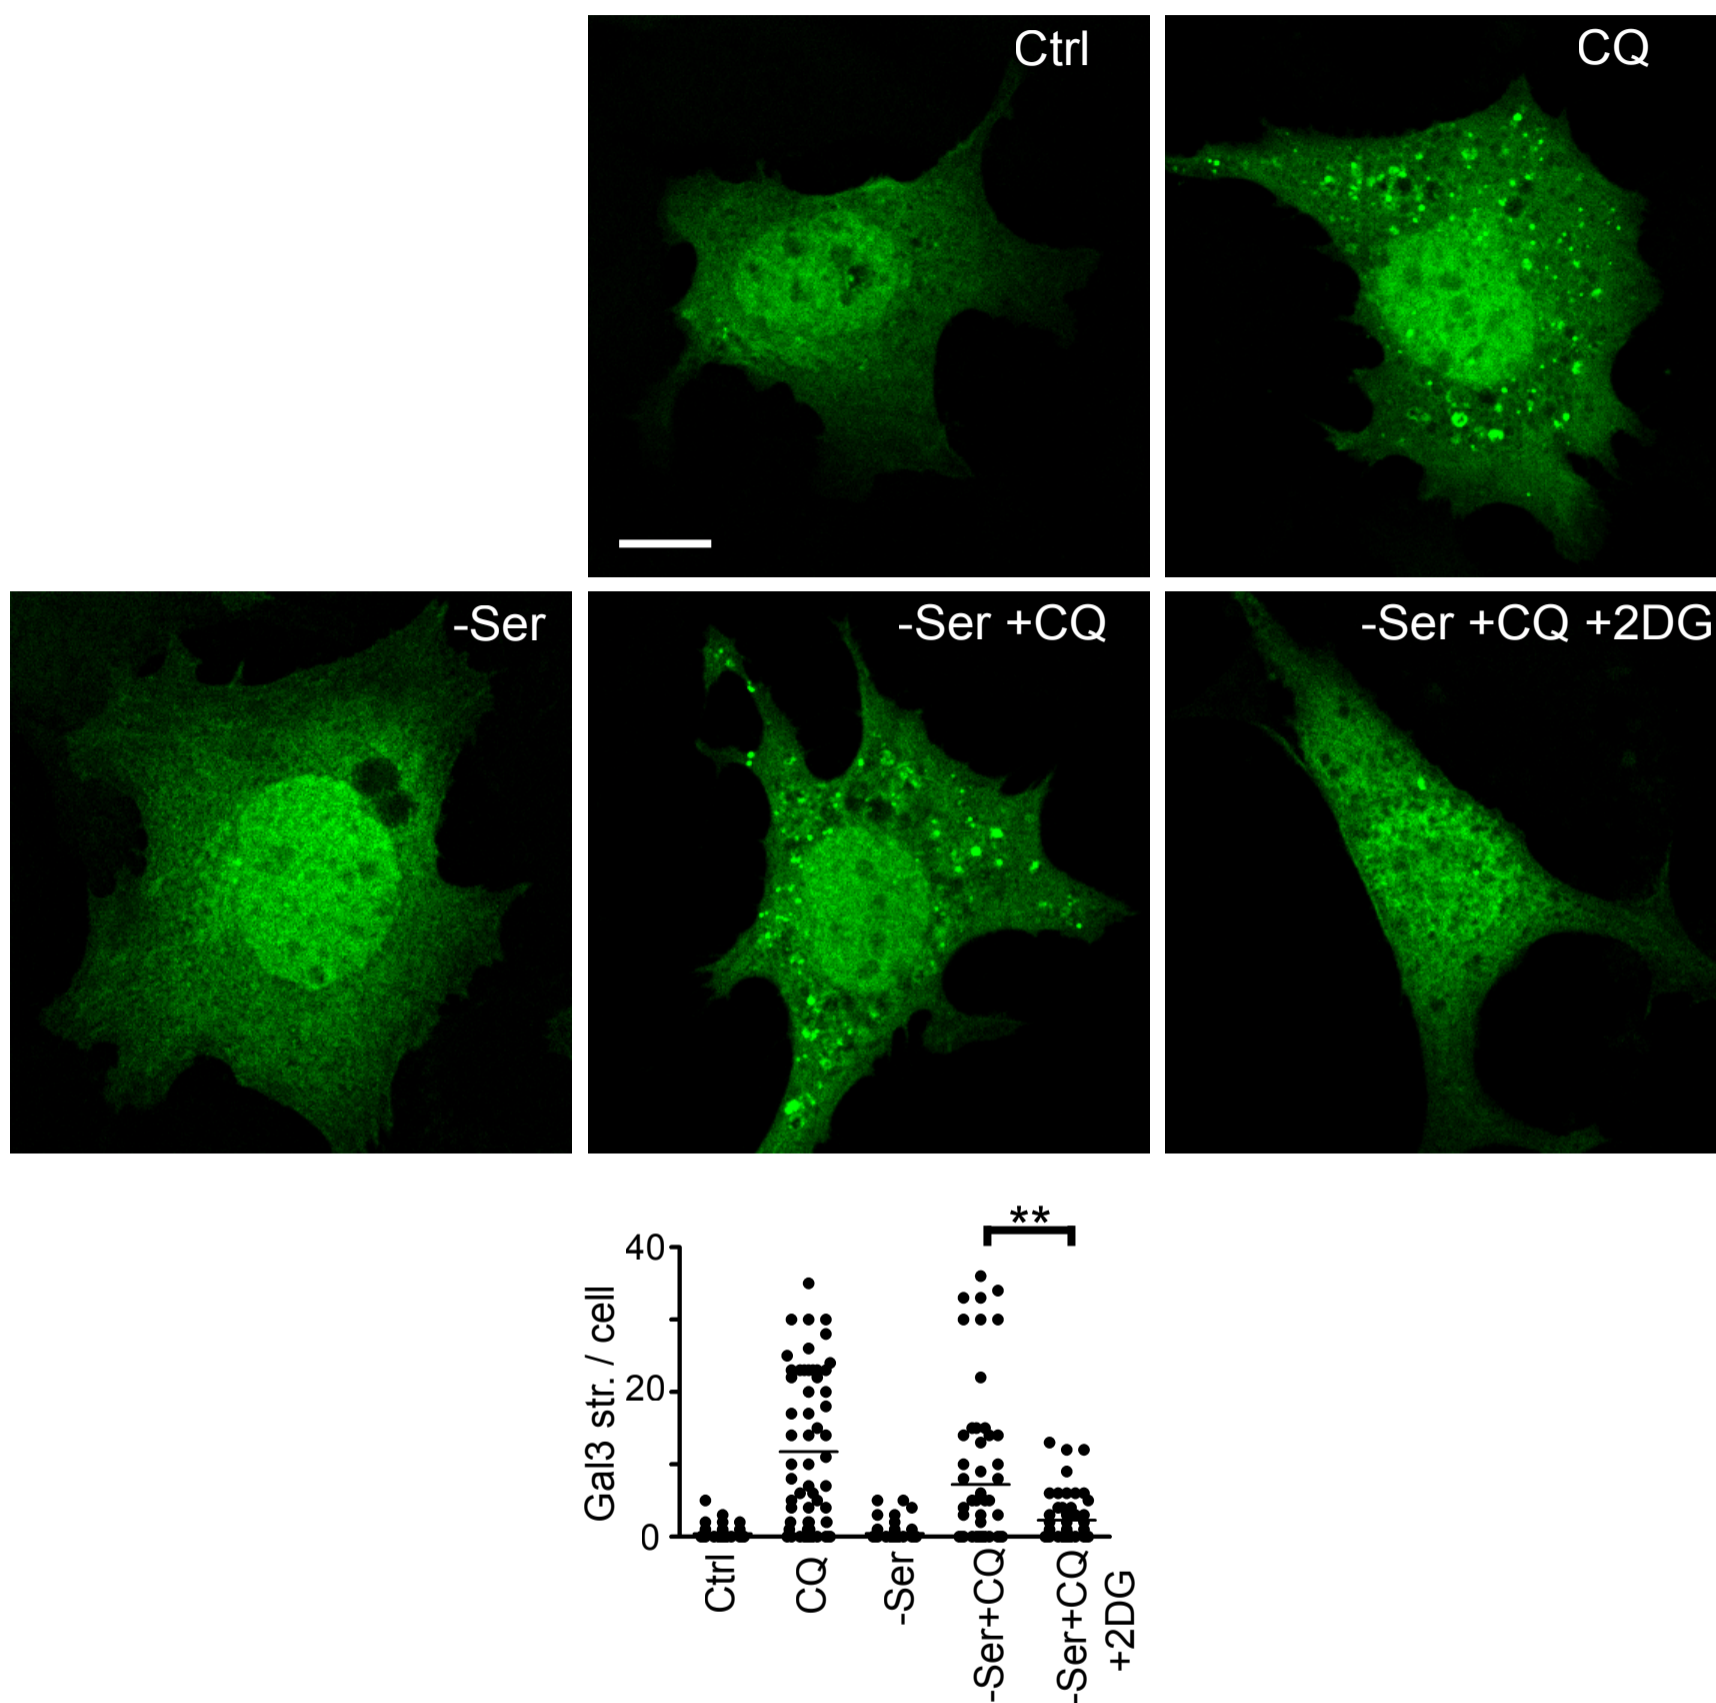

**Supplemental Figure 4. Inhibition of glycolysis rescues CQ-mediated lysosome damage.**

Wildtype MEF expressing GFP-Galectin3 were treated to CQ (25 $\mu$ M) in full-nutrient media or in combination with serum starvation (+/-2-deoxyglucose (5mM)) as indicated for 18hrs. Scale bar: 10  $\mu$ m. GFP-Galectin3 puncta were quantified in MEF as indicated for 18hrs (60 cells from N=3 samples). (\*\*) P < 0.01 by paired t-test. 2DG inhibits lysosomal damage from CQ.
